# Supplementary material for: Domperidone Inhibits Clostridium botulinum C2 Toxin and Bordetella pertussis Toxin
Source: MDPI journal article supplement (doi:10.3390/toxins15070412), 2023-06-25
Supplement: s1 [file s1]

# Supplementary figure S1

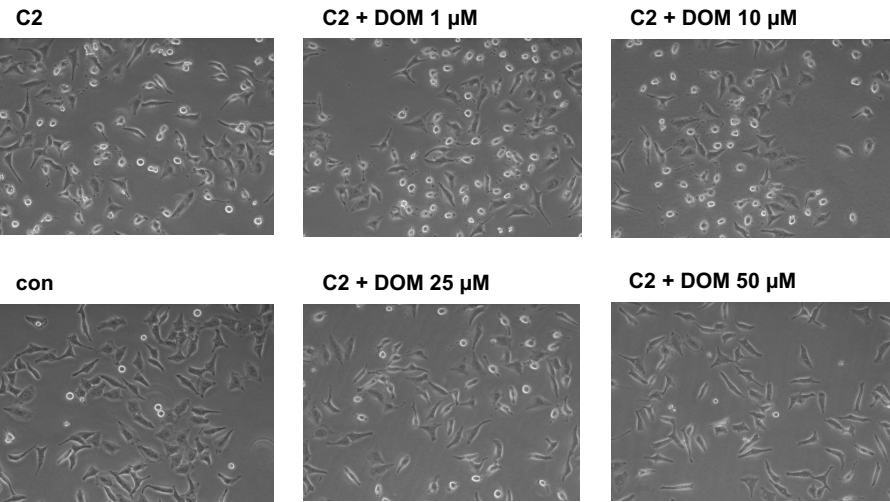

**Supplementary figure S1.** Effect of different DOM concentrations on intoxication of HeLa cells with C2 toxin. HeLa cells were pre-incubated at 37 ° C with indicated concentrations of DOM for 30 min or left untreated for control (con). Then, cells were challenged with C2 toxin (50 ng/ml C2I plus 100 ng/ml C2IIa) for 5 h in the presence or absence of the inhibitor. Pictures show the toxin-induced morphological changes after 5 h.
